# Supplementary material for: Novel reassortant clade 2.3.4.4 avian influenza A (H5N8) virus in a grey heron in South Korea in 2017
Source: PubMed Central journal article supplement (PMC5671518; doi:10.1007/s00705-017-3547-2), 2017-09-12

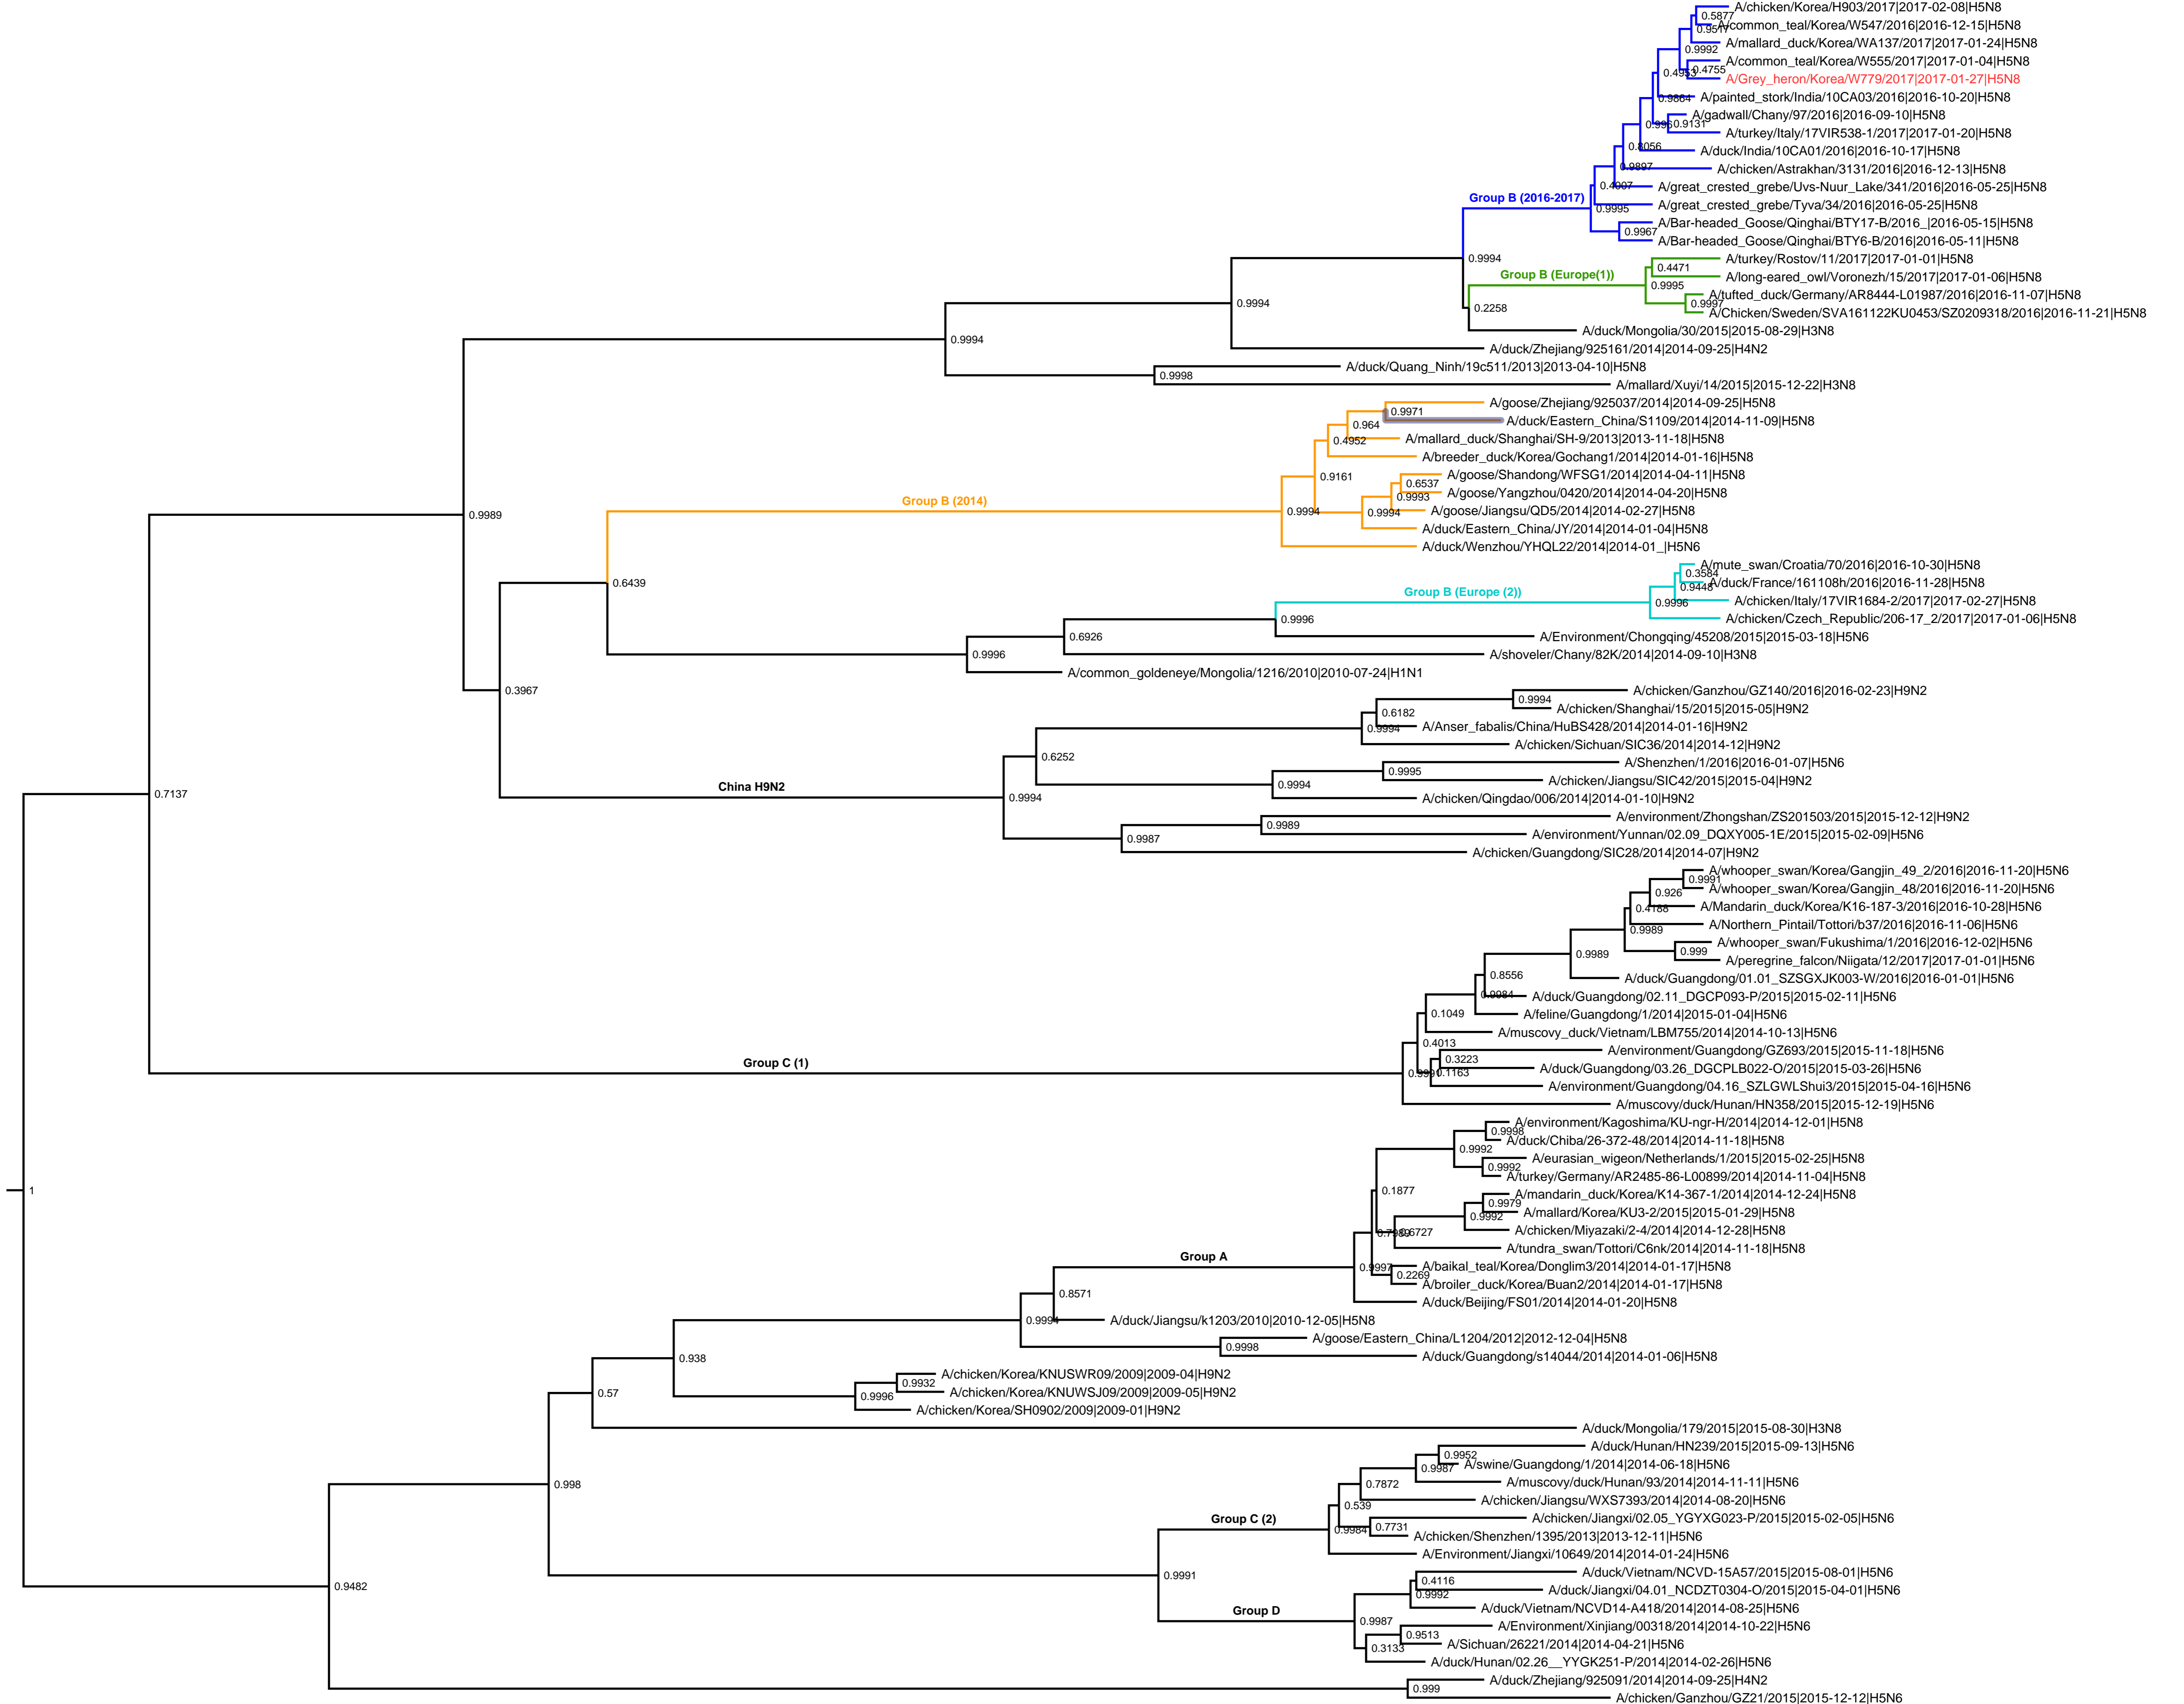

Supplement: 705_2017_3547_MOESM7_ESM.pdf [file 705_2017_3547_MOESM7_ESM.pdf]
