# Supplementary material for: Novel reassortant clade 2.3.4.4 avian influenza A (H5N8) virus in a grey heron in South Korea in 2017
Source: Springer Nature journal article supplement (doi:10.1007/s00705-017-3547-2), 2017-09-12
Supplement: MOESM2 [file 15046700]

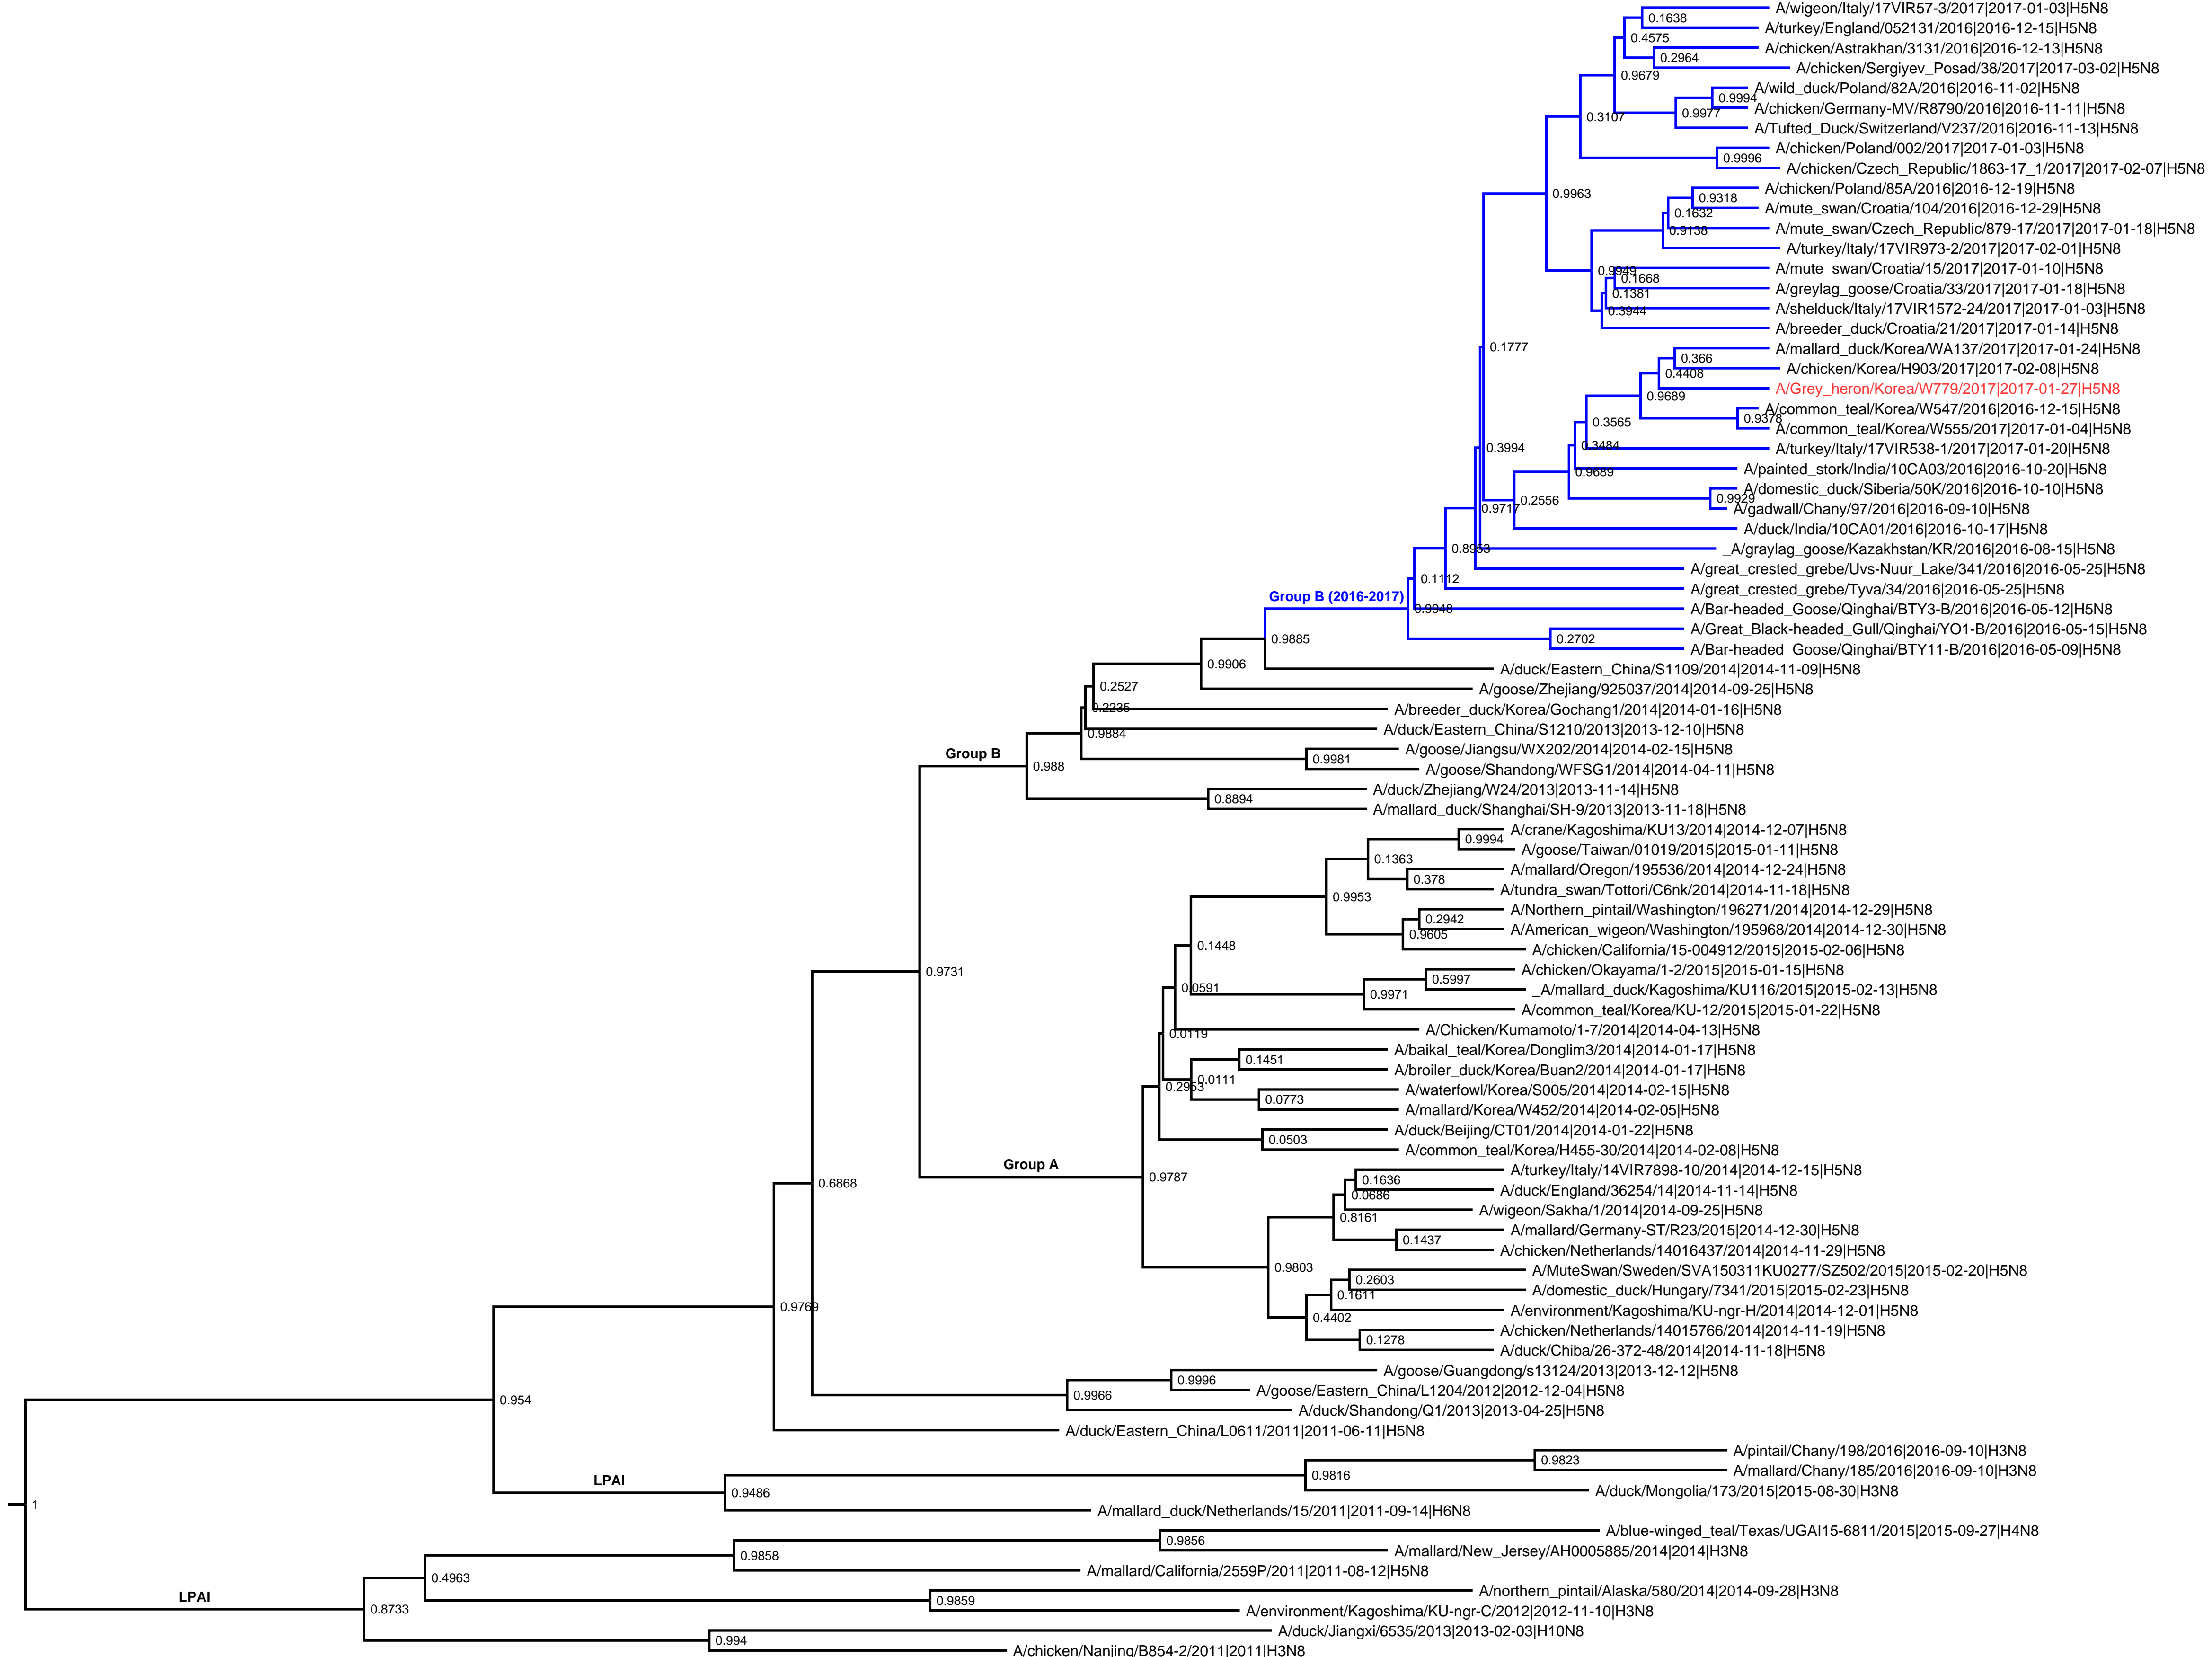

20

2005 2007.5 2010 2012.5 2015 2017.5
